# Supplementary material for: Impacts of Differentially Shaped Silver Nanoparticles with Increasingly Complex Hydrophobic Thiol Surface Coatings in Small-Scale Laboratory Microcosms
Source: MDPI journal article supplement (doi:10.3390/nano14080654), 2024-04-09
Supplement: s1 [file s1]

# Impacts of Differentially Shaped Silver Nanoparticles with Increasingly Complex Hydrophobic Thiol Surface Coatings in Small-Scale Laboratory Microcosms

**Bryan J. Harper 1, Arek M. Engstrom 1,2, Stacey L. Harper 1,2,3,\* and Marilyn R. Mackiewicz 4,\***

1 Department of Environmental and Molecular Toxicology, Oregon State University, Corvallis, OR 97331, USA; bryan.harper@oregonstate.edu (B.J.H.); arek.engstrom@gmail.com (A.M.E.)

2 School of Chemical, Biological, and Environmental Engineering, Oregon State University, Corvallis, OR 97331, USA

3 Oregon Nanoscience and Microtechnologies Institute, Corvallis, OR 97331, USA

4 Department of Chemistry, Oregon State University, Corvallis, OR 97331, USA

\* Correspondence: stacey.harper@oregonstate.edu (S.L.H.); marilyn.mackiewicz@oregonstate.edu (M.R.M.)

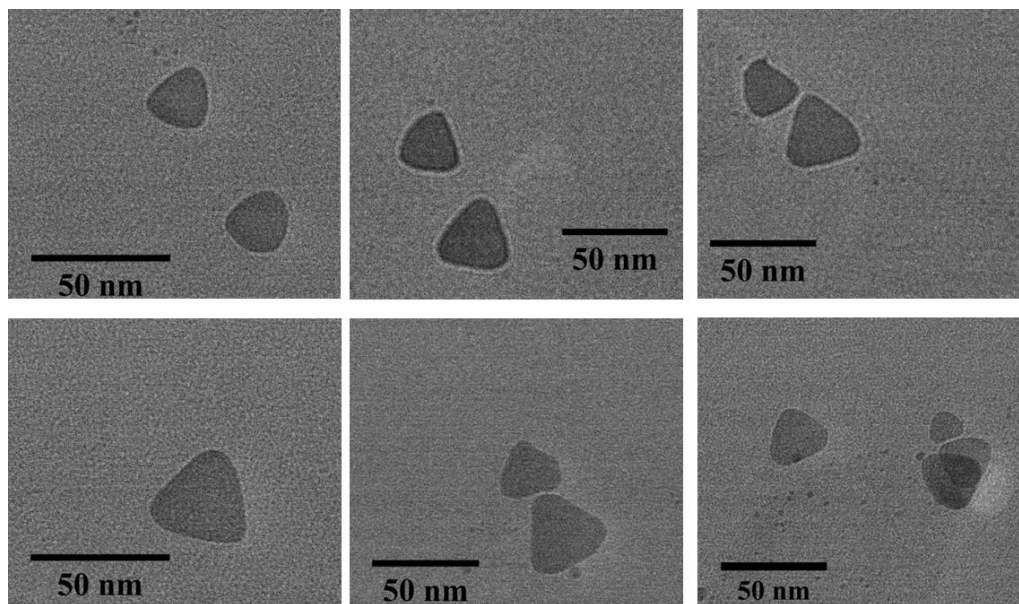

**Figure S1.** Representative TEM distribution and histogram analysis of hybrid lipid-coated AgNPLs. TEM scale bar is 50 nm.

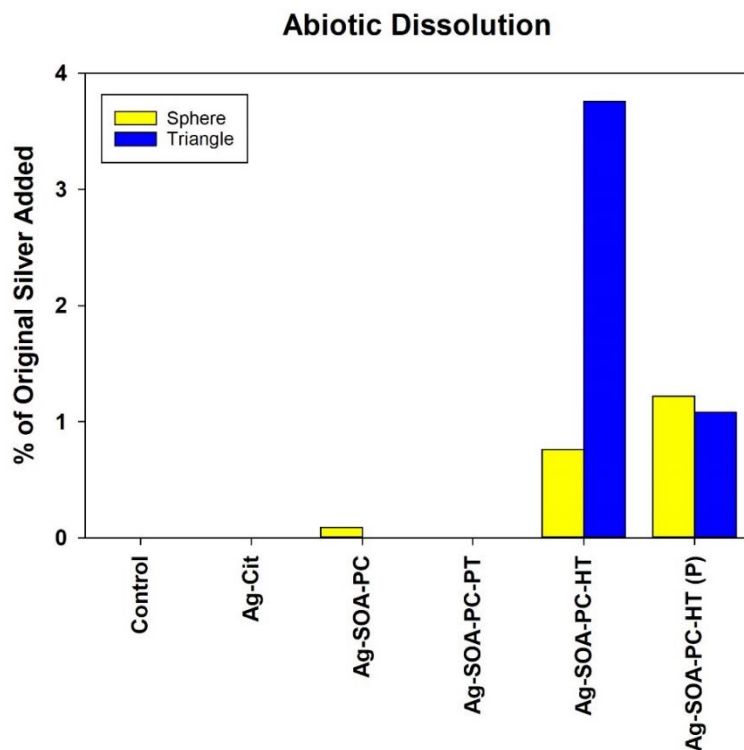

**Figure S2:** Percentage of original 0.5 mg Ag/L added to each flask found in the microcosm media as dissolved  $\text{Ag}^+$  after 7 days without organisms present in the flasks. None of the measured amounts are significantly different than the control (no AgNPs present).

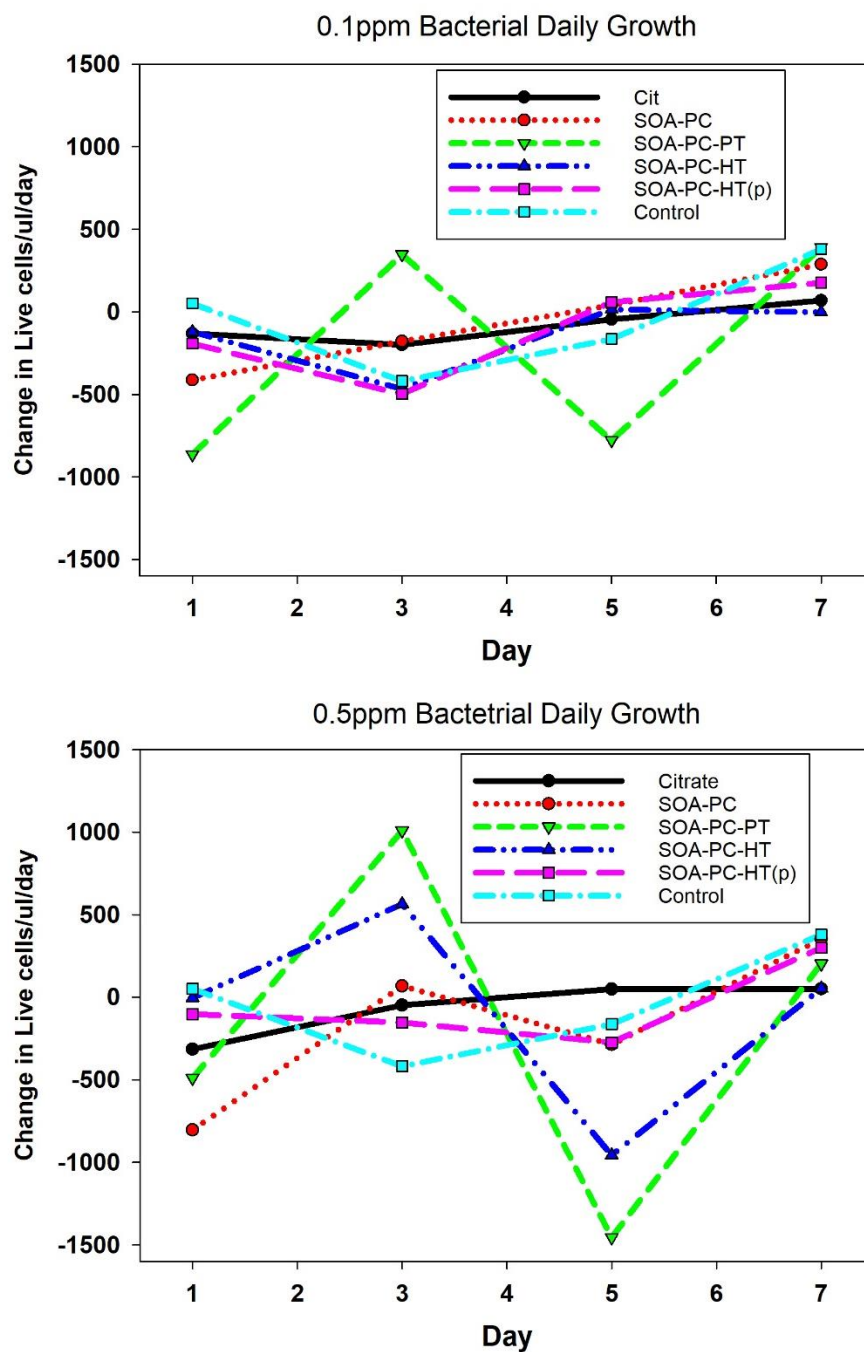

**Figure S3:** Bacterial growth represented as the change in the number of live cells over the 7-day experiment for spherical AgNPs with varying surface chemistries at 0.1 and at 0.5 mg Ag/L

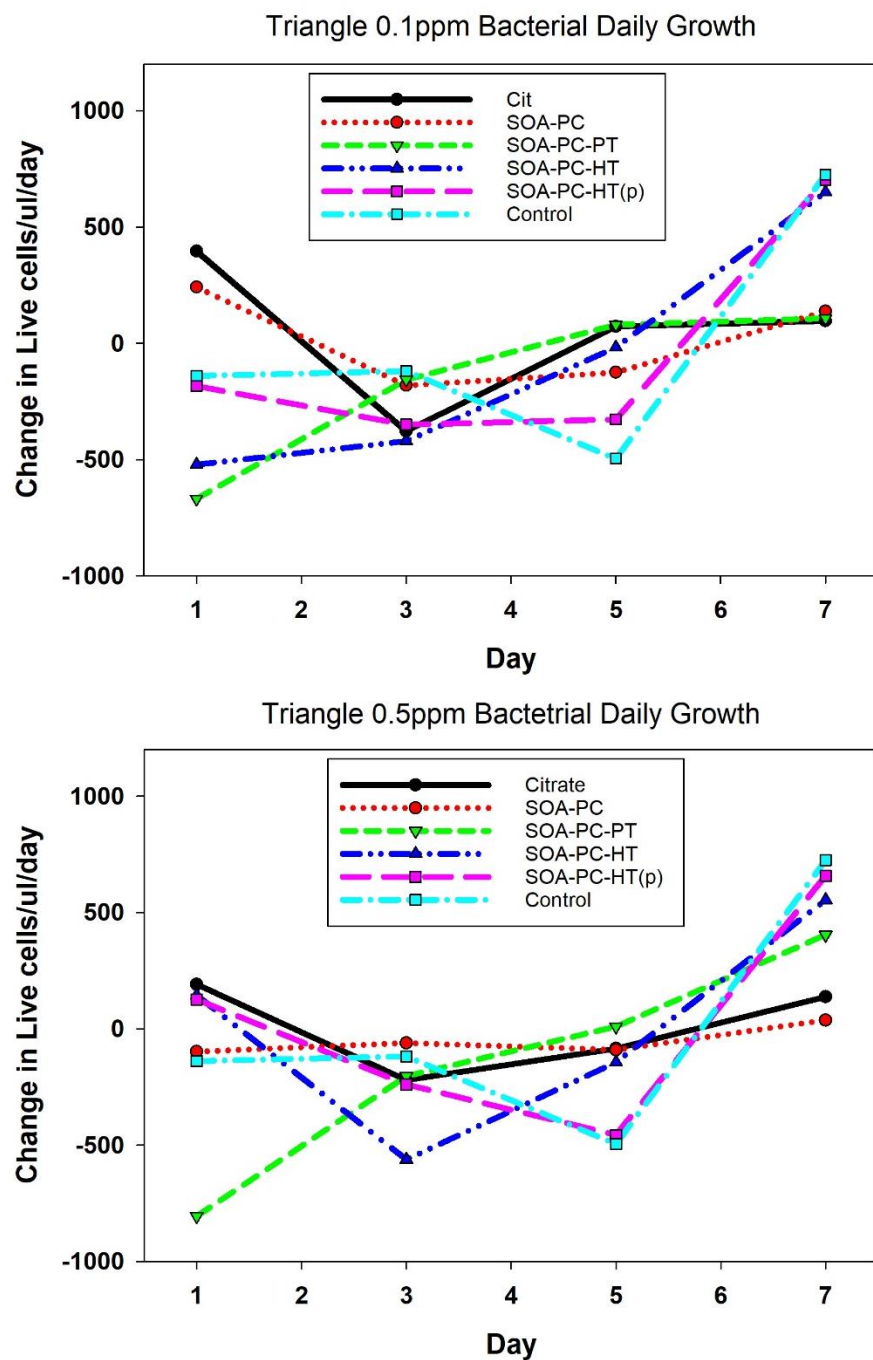

**Figure S4:** Bacterial growth represented as the change in the number of live cells over the 7-day experiment for triangular AgNPs with varying surface chemistries at 0.1 and at 0.5 mg Ag/L.

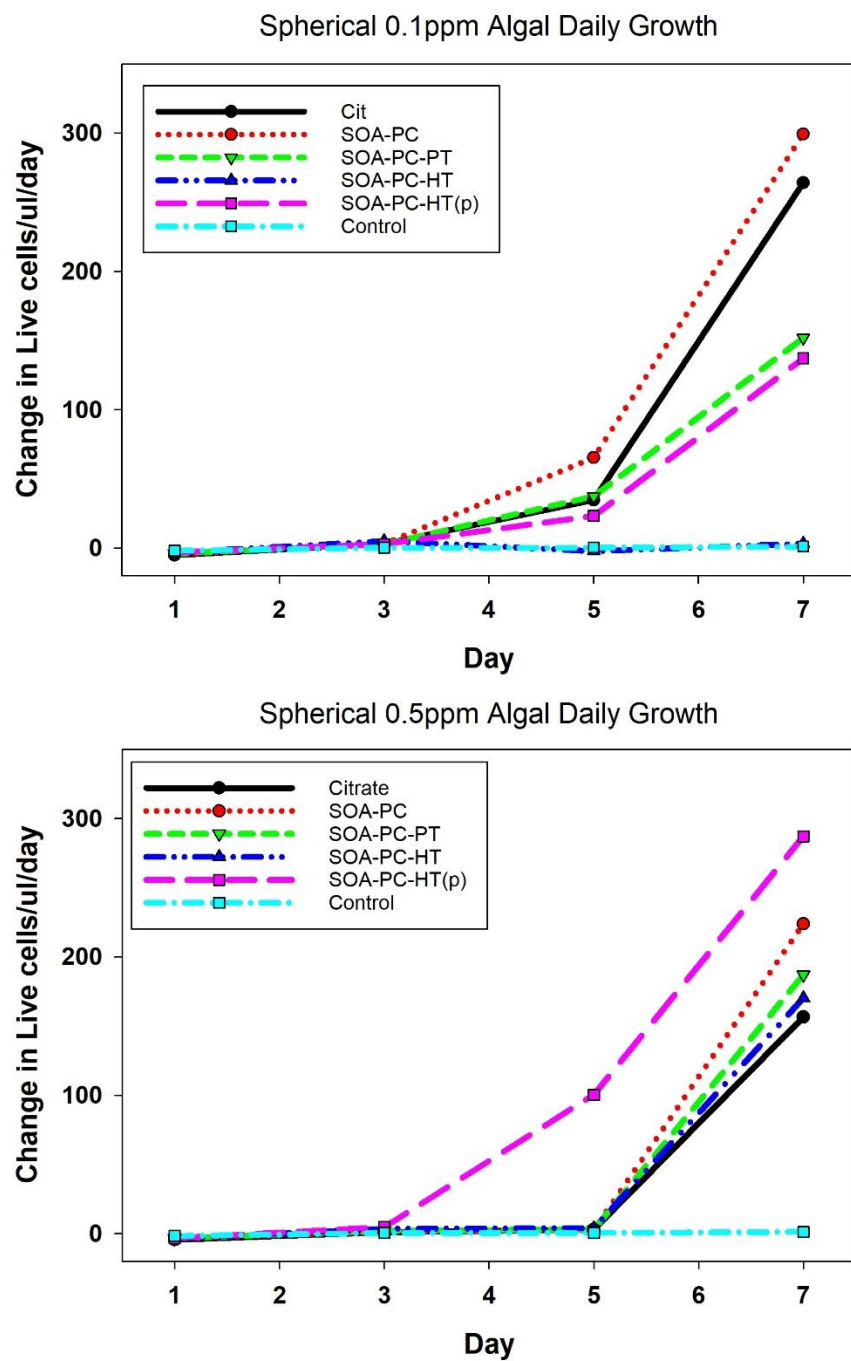

**Figure S5:** Change in the number of live algal cells following exposure to spherical AgNPs at 0.1 and 0.5 mg Ag/L over the 7-day experimental period.

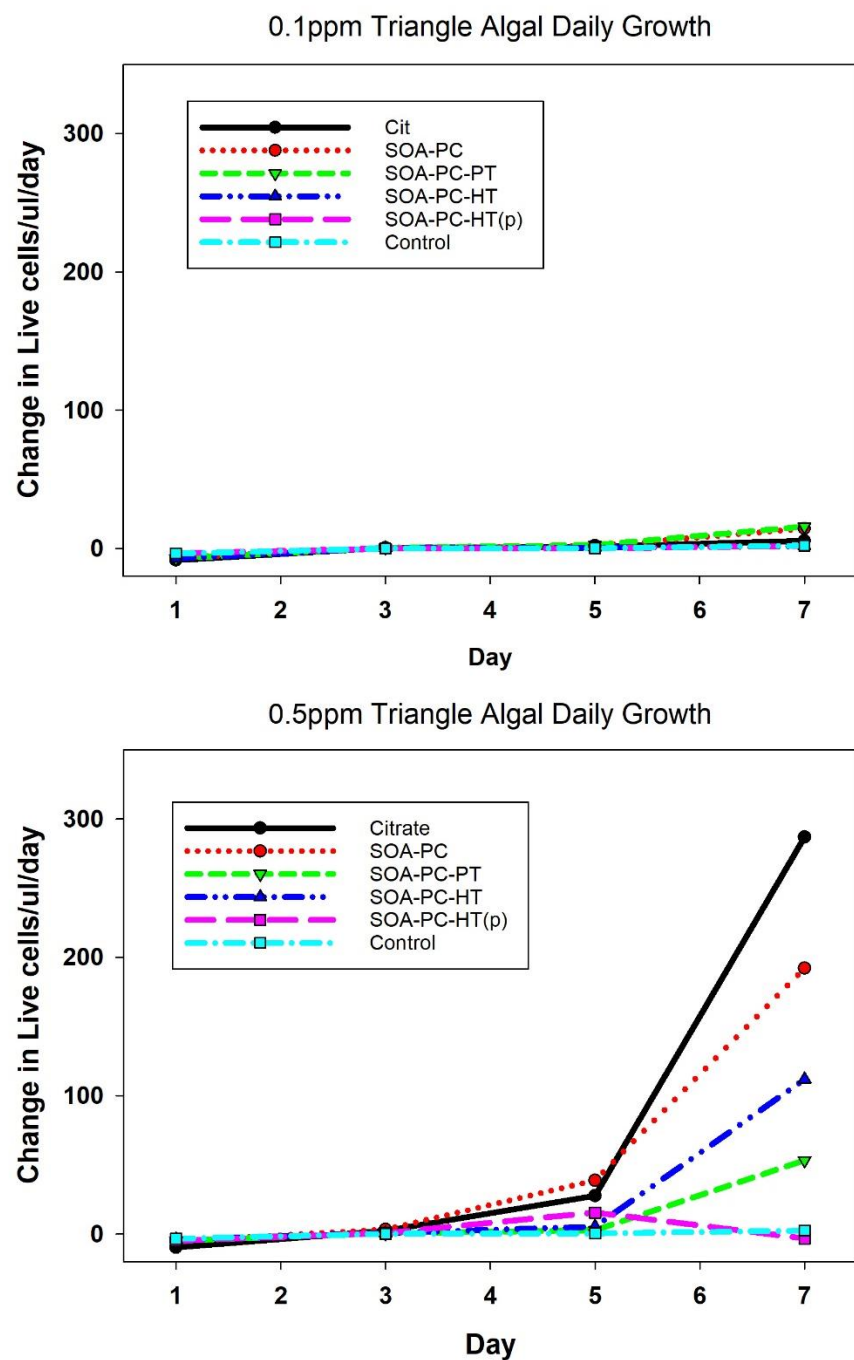

**Figure S6:** Change in the number of live algal cells following exposure to triangular AgNPs at 0.1 and 0.5 mg Ag/L over the 7-day experimental period.

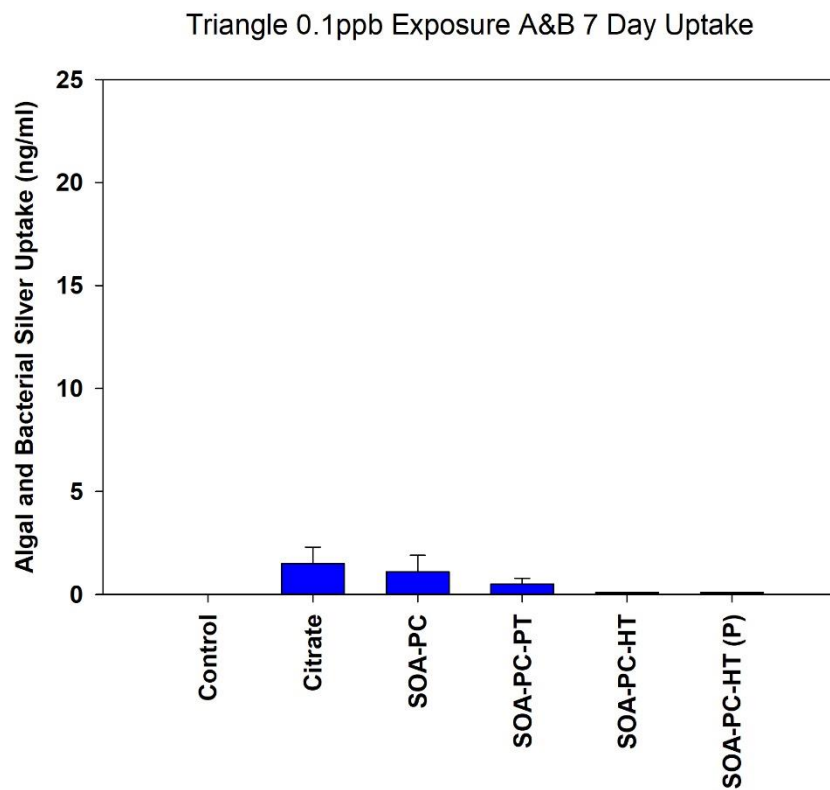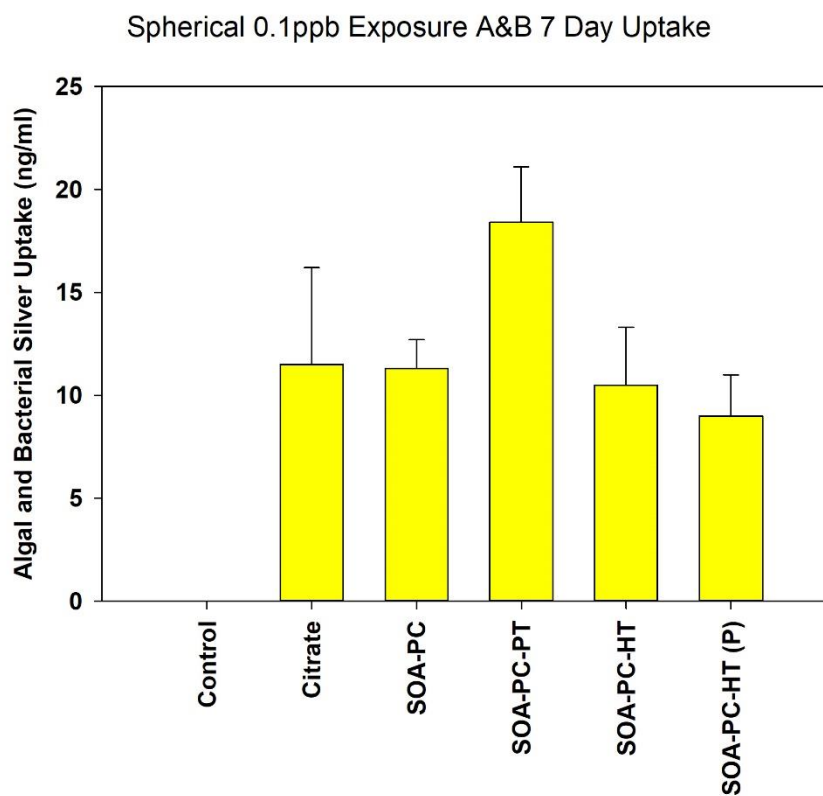

**Figure S7:** Silver uptake in algal and bacterial cells following 7 day exposure to 0.1 mg Ag/L of lipid coated triangular and spherical nanoparticles with varying surface chemistries.

### 0.1 ppm Spherical Daphnia Mortality

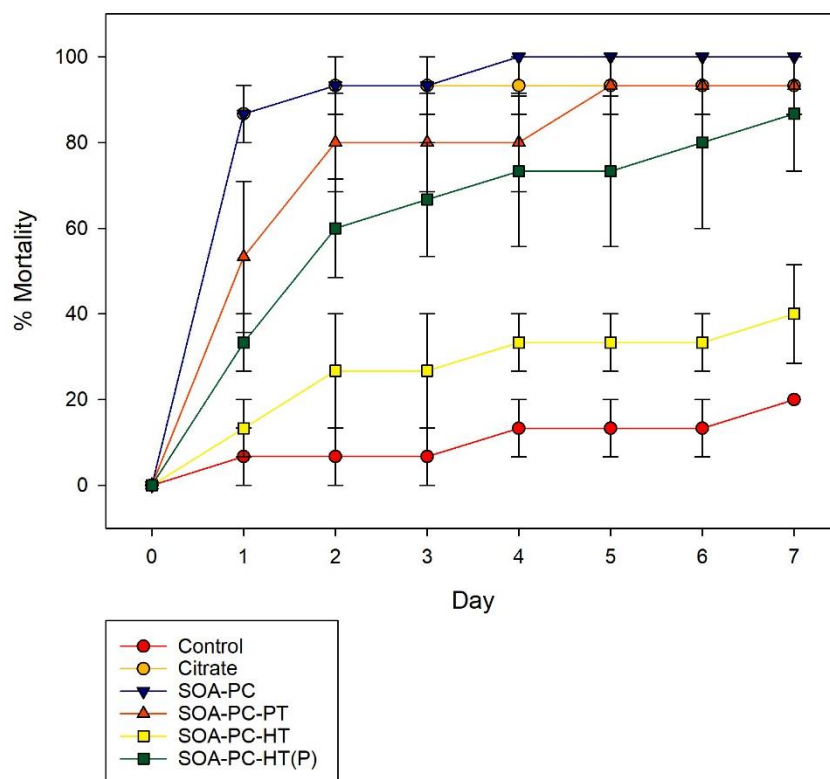

**Figure S8:** Daily mortality rate (%) for daphnids exposed to AgNSs at 0.1 mg Ag/L over the 7-day experimental period.



### Triangular 0.1ppm Daphnia

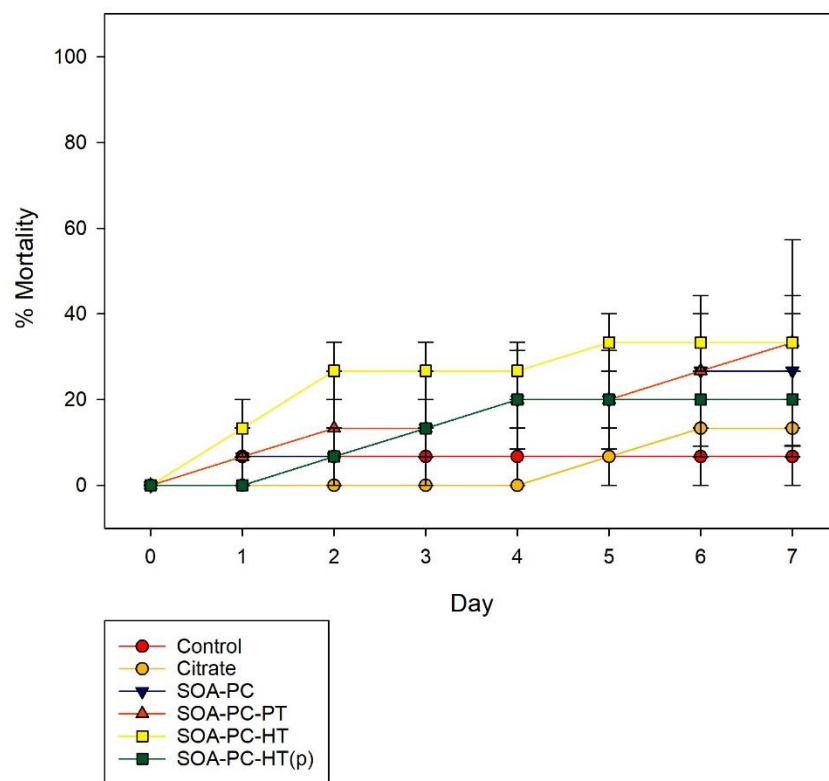

**Figure S9:** Daily mortality rate (%) for daphnids exposed to AgNPLs at 0.1 mg Ag/L over the 7-day experimental period.

### 0.5 ppm Spherical Daphnia Mortality

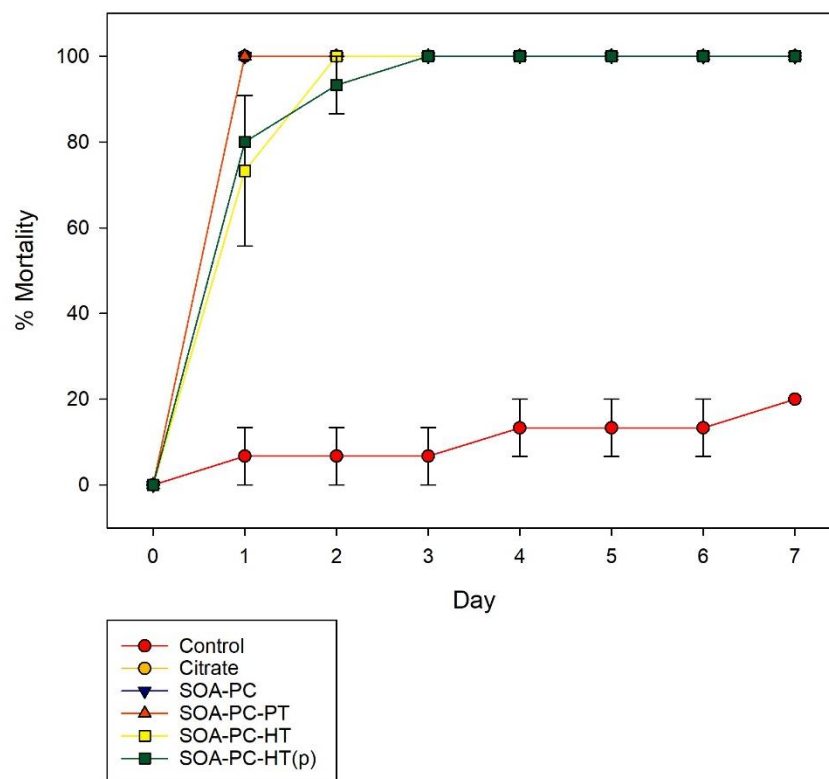

**Figure S10:** Daily mortality rate (%) for daphnids exposed to AgNSs at 0.5 mg Ag/L over the 7-day experimental period.

### Triangle 0.5 ppm Daphnia Mortality

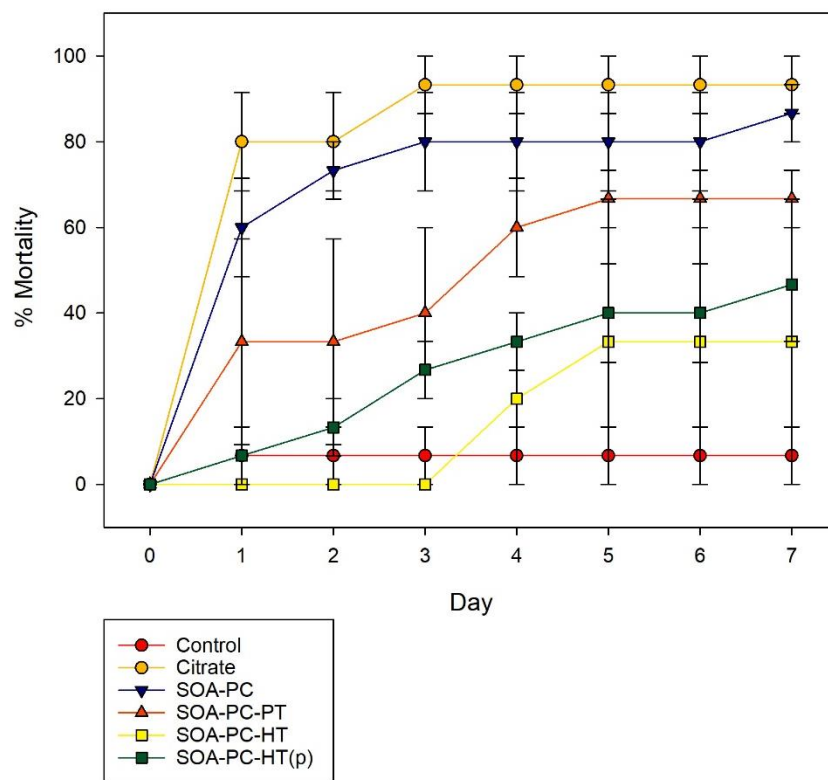

**Figure S11:** Daily mortality rate (%) for daphnids exposed to AgNPLs at 0.5 mg Ag/L over the 7-day experimental period.

Daphnia Uptake 0.1ppm exposure

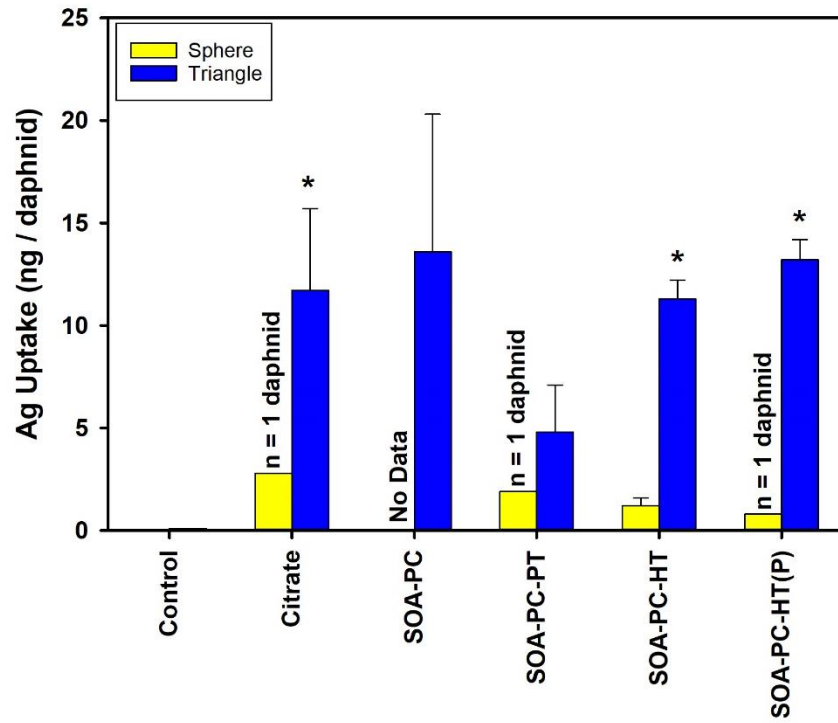

**Figure S12:** Silver uptake by *Daphnia* surviving the 7-day exposure as determined by ICP-MS. Asterisk indicates significance relative to control daphnid silver content.

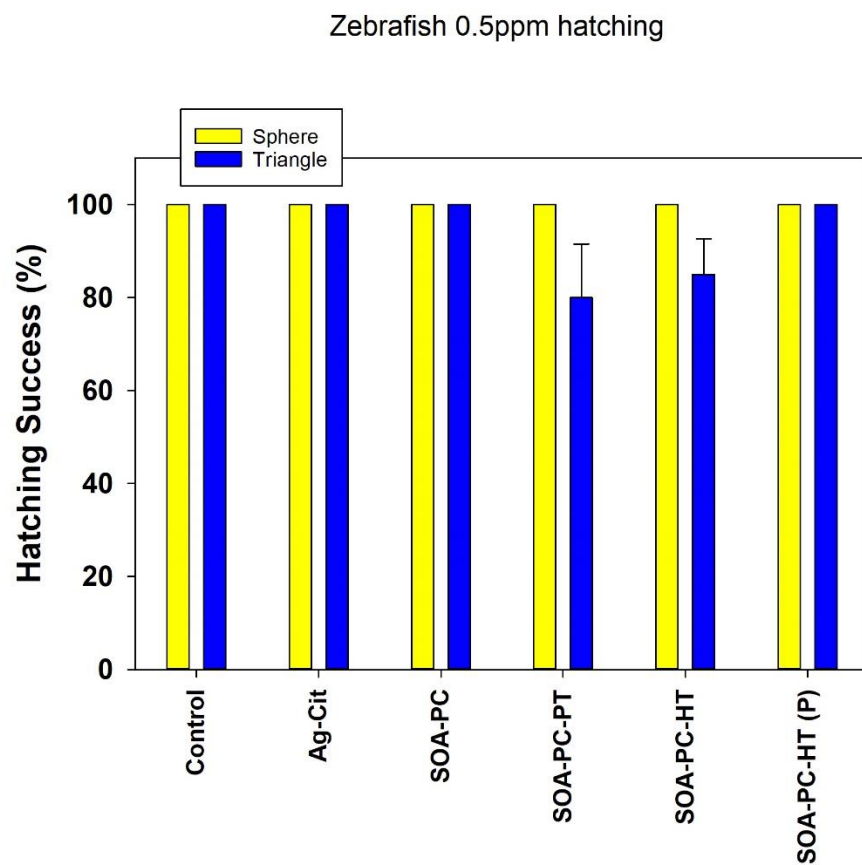

**Figure S13:** Hatching rate for zebrafish embryos exposed to spherical or triangular AgNPs at 0.5 mg Ag/L over the 7-day experimental period.
